# Supplementary material for: Reaction Steps in Heterogeneous Photocatalytic Oxidation of Toluene in Gas Phase—A Review
Source: MDPI journal article supplement (doi:10.3390/molecules28186451), 2023-09-06
Supplement: s1 [file s1]

## Supplemental Materials

**Table 1S. Some thermodynamic parameters of identified Gas-phase by-products during PCO over TiO<sub>2</sub><sup>i</sup>**

| Compounds            | CAS No.  | Dipole moment<br>$\mu/D$                     | Boiling temperature, °C | $\Delta_f H^\circ$ ,<br>kJ·mol <sup>-1</sup> | $\Delta_f G^\circ$ , kJ·mol <sup>-1</sup> | $S^\circ$ , J·mol <sup>-1</sup> ·K <sup>-1</sup> | $C_p$ , J·mol <sup>-1</sup> ·K <sup>-1</sup> |
|----------------------|----------|----------------------------------------------|-------------------------|----------------------------------------------|-------------------------------------------|--------------------------------------------------|----------------------------------------------|
| Formaldehyde (g)     | 50-00-0  | 2.332(2)                                     | -19.1(0.5)              | -108.6                                       | -102.5                                    | 218.8                                            | 35.4                                         |
| Benzene (l)          | 71-43-2  | 0                                            | 80.08(0.07)             | 49,1                                         | 124,5                                     | 173,4                                            | 136,0                                        |
| Acrolein             | 107-02-8 | <i>Trans</i> 3.117(4)<br><i>Cis</i> 2.552(3) | 52.3(0.1)               |                                              |                                           |                                                  |                                              |
| Acetaldehyde (l)     | 75-07-0  | 2.750(6)                                     | 20.8(0.6)               | -192,2                                       | -127,6                                    | 160,2                                            | 89,0                                         |
| Maleic anhydride (g) | 108-31-6 | 3.95 <sup>ii</sup>                           | 52.56(0.04)             | -398,3                                       |                                           |                                                  |                                              |
| m-Cresol (l)         | 108-39-4 | 1.48                                         | 202.2(0.1)              | -194.0                                       |                                           | 212.6                                            | 224.9                                        |
| p-Cresol (c)         | 106-44-5 | 1.48                                         | 201.9(0.1)              | -204.6                                       |                                           | 165.4                                            | 154.6                                        |
| o-Cresol (c)         | 95-48-7  | 1.45                                         | 191.0(0.1)              | -199.3                                       |                                           | 167.3                                            | 150.2                                        |
| Formic acid (l)      | 64-18-6  | 1.425(2)                                     | 101                     | -425.0                                       | -361.4                                    | 129.0                                            | 99.0                                         |
| Phenol (c)           | 108-95-2 | 1.224(8)                                     | 181.8(0.1)              | -165.1                                       |                                           | 144.0                                            | 127.4                                        |
| Acetic acid (l)      | 64-19-7  | 1.70(3)                                      | 117.9(0.2)              | -484.3                                       | -389.9                                    | 159.8                                            | 123.3                                        |
| Pentanal (l)         | 110-62-3 | 2.57 <sup>ii</sup>                           | 103(2)                  | -267.2                                       |                                           |                                                  |                                              |
| o-xylene (l)         | 95-47-6  | 0.640(5)                                     | 144.4(0.4)              | -24.4                                        |                                           |                                                  | 186.1                                        |
| m-xylene (l)         | 108-38-3 |                                              | 139.1(0.4)              | -25.4                                        |                                           |                                                  | 183.0                                        |
| p-xylene (l)         | 106-42-3 |                                              | 138.3(0.5)              | -24.4                                        |                                           |                                                  | 181.5                                        |
| Toluene (l)          | 108-88-3 | 0.375(10)                                    | 110.60(0.07)            | 12.4                                         |                                           | 157.3                                            | 50.5                                         |
| Methanol (l)         | 67-56-1  | 1.70(2)                                      | 64.5(0.7)               | -239.2                                       | -166.6                                    | 126.8                                            | 81.1                                         |
| Acetone (l)          | 67-64-1  | 2.88(3)                                      | 56.08(0.07)             | -248.4                                       |                                           | 199.8                                            | 126.3                                        |
| Ethanol (l)          | 64-17-5  | 1.69(3)                                      | 78.24(0.09)             | -277.6                                       | -174.8                                    | 160.7                                            | 112.3                                        |
| Propionaldehyde (l)  | 123-38-6 | 2.72                                         | 48.0(0.2)               | -215.6                                       |                                           |                                                  |                                              |
| methyl glyoxal (l)   | 78-98-8  |                                              | 72(15)                  | -309.1                                       |                                           |                                                  |                                              |
| Propylene (g)        | 115-07-1 | 0.366(1)                                     | -47.6(0.1)              | 20.0                                         |                                           |                                                  |                                              |
| Benzaldehyde (l)     | 100-52-7 | 3.0                                          | 178.7(0.4)              | -87.0                                        |                                           | 221.2                                            | 172.0                                        |

|                     |           |                           |            |        |  |       |       |
|---------------------|-----------|---------------------------|------------|--------|--|-------|-------|
| Benzyl alcohol (l)  | 100-51-6  | 1.71(9)                   | 205.3(0.2) | -160.7 |  | 216.7 | 217.9 |
| Benzoic acid (c)    | 65-85-0   | 1.72 <sup>ii</sup>        | 250.2(0.6) | -385.2 |  | 167.6 | 146.8 |
| Vinyl methyl ketone | 78-94-4   | 2.90 ± 1.08 <sup>ii</sup> | 81(4)      |        |  |       |       |
| Nonbornane (c)      | 279-23-2  |                           | 107(6)     | -95.1  |  |       | 151.0 |
| phthalic acid (c)   | 88-99-3   | 2.60 <sup>ii</sup>        | 150        | -782.0 |  | 207.9 | 188.1 |
| Itaconic anhydride  | 2170-03-8 |                           |            |        |  |       |       |
| Pentanal (l)        | 110-62-3  | 2.57 <sup>ii</sup>        | 103(2)     | -267.2 |  |       |       |
| Heptanal (l)        | 111-71-7  | 2.56 <sup>ii</sup>        | 153        | -311.5 |  | 335.4 | 230.1 |
| 2-methylfuran (l)   | 534-22-5  | 0.65(5)                   | 63.9(0.2)  |        |  |       |       |

**Table 2S. Some thermodynamic parameters of identified solid-phase by-products during PCO over TiO<sub>2</sub><sup>iii</sup>**

| Compounds                              | CAS No.                   | Dipole moment, $\mu$ /D | Boiling temperature, °C | $\Delta_f H^\circ$ , kJ·mol <sup>-1</sup> | $\Delta_f G^\circ$ , kJ·mol <sup>-1</sup> | $S^\circ$ , J·mol <sup>-1</sup> ·K <sup>-1</sup> | $C_p$ , J·mol <sup>-1</sup> ·K <sup>-1</sup> |
|----------------------------------------|---------------------------|-------------------------|-------------------------|-------------------------------------------|-------------------------------------------|--------------------------------------------------|----------------------------------------------|
| 4-hydroxybenzoic acid                  | 99-96-7                   | 2.76 <sup>ii</sup>      |                         |                                           |                                           |                                                  |                                              |
| 4-hydroxybenzyl alcohol                | 623-05-2                  |                         | 252                     |                                           |                                           |                                                  |                                              |
| 4-hydroxybenzaldehyde                  | 123-08-0                  | 4.22 <sup>ii</sup>      |                         |                                           |                                           |                                                  |                                              |
| 3-hydroxybenzaldehyde                  | 100-83-4                  | 2.78 <sup>ii</sup>      | 240                     |                                           |                                           |                                                  |                                              |
| muconic acid (2,4-hexadienedioic acid) | <a href="#">1119-72-8</a> | 0.36 <sup>ii</sup>      | 228                     |                                           |                                           |                                                  |                                              |
| p-Hydroquinone (c)                     | 123-31-9                  | 2.38(5)                 | 288(5)                  | -364.5                                    |                                           |                                                  | 136.0                                        |
| 1,3-Butadiene (l)                      | 106-99-0                  | 0 <sup>ii</sup>         | -4.6(0.2)               | 88.5                                      |                                           | 199.0                                            | 123.6                                        |
| Butyraldehyde (l)                      | 123-72-8                  | 2.72 <sup>ii</sup>      | 74.8(0.2)               | -239.2                                    |                                           | 246.6                                            | 163.7                                        |
| $\gamma$ -Butyrolactone (l)            | 96-48-0                   | 4.27(3)                 | 204.6(0.4)              | -420.9                                    |                                           |                                                  | 141.4                                        |
| Salicylaldehyde (l)                    | 90-02-8                   | 2.86                    | 208(5)                  |                                           |                                           |                                                  | 222.0                                        |
| Oxalic acid (c)                        | 144-62-7                  |                         | 157                     |                                           |                                           |                                                  |                                              |
| Pyruvic acid                           | 127-17-3                  | 2.30 <sup>ii</sup>      | 165                     | -829.9                                    |                                           | 109.8                                            | 91.0                                         |
| Propionic acid                         | 79-09-4                   | 1.75(9)                 | 141.5(0.2)              | -510.7                                    |                                           | 191.0                                            | 152.8                                        |
| Isovaleric acid (l)                    | 503-74-2                  | 0.63                    | 176.5(0.2)              | -561.6                                    |                                           |                                                  |                                              |
| Succinic acid (c)                      | 110-15-6                  |                         | 234(3)                  | -940.5                                    |                                           | 167.3                                            | 153.1                                        |
| p-benzoquinone (c)                     | 106-51-4                  | 0.66 <sup>ii</sup>      | sub                     | -185.7                                    |                                           |                                                  | 129.0                                        |
| Hexane (l)                             | 110-54-3                  | 0.08 <sup>ii</sup>      | 68.72(0.06)             | -198.7                                    |                                           |                                                  | 195.6                                        |

<sup>i</sup> Haynes, W.M. (Ed.). (2016). CRC Handbook of Chemistry and Physics (97th ed.). CRC Press. <https://doi.org/10.1201/9781315380476>

<sup>ii</sup> <http://www.stenutz.eu/chem/dipole.php>

<sup>iii</sup> Haynes, W.M. (Ed.). (2016). CRC Handbook of Chemistry and Physics (97th ed.). CRC Press. <https://doi.org/10.1201/9781315380476>
